# Supplementary material
Source: PubMed Central journal article supplement (PMC7611204)
Supplement: EMS128580-supplement-Supplementary_Information.pdf [file EMS128580-supplement-Supplementary_Information.pdf]

## SUPPLEMENTARY INFORMATION:

### Repurposing the antidepressant sertraline as SHMT inhibitor to suppress serine/glycine synthesis addicted breast tumor growth.

Shauni Lien Geeraerts<sup>1,2,†</sup>, Kim Rosalie Kampen<sup>1,3,†</sup>, Gianmarco Rinaldi<sup>4,5</sup>, Purvi Gupta<sup>6</sup>, Mélanie Planque<sup>4,5</sup>, Nikolaos Louros<sup>7,8</sup>, Elien Heylen<sup>1</sup>, Kaat De Cremer<sup>2</sup>, Katrijn De Brucker<sup>2</sup>, Stijn Vereecke<sup>1</sup>, Benno Verbelen<sup>1</sup>, Pieter Vermeersch<sup>9</sup>, Joost Schymkowitz<sup>7,8</sup>, Frederic Rousseau<sup>7,8</sup>, David Cassiman<sup>10</sup>, Sarah-Maria Fendt<sup>4,5</sup>, Arnout Voet<sup>6</sup>, Bruno P.A. Cammue<sup>2</sup>, Karin Thevissen<sup>2,‡,\*</sup>, Kim De Keersmaecker<sup>1,‡,\*</sup>

<sup>1</sup>Laboratory for Disease Mechanisms in Cancer, Department of Oncology, KU Leuven and Leuven Cancer Institute (LKI), Herestraat 49, 3000 Leuven, Belgium; <sup>2</sup>Centre of Microbial and Plant Genetics – Plant Fungi Interactions (CMPG-PFI), KU Leuven, Kasteelpark Arenberg 20, 3001 Heverlee, Belgium; <sup>3</sup>Maastricht University Medical Center, Department of Radiation Oncology (MAASTRO), GROW School for Oncology and Developmental Biology, Maastricht, The Netherlands; <sup>4</sup>Laboratory of Cellular Metabolism and Metabolic Regulation, VIB-KU Leuven Center for Cancer Biology, VIB Leuven, Herestraat 49, 3000 Leuven, Belgium; <sup>5</sup>Laboratory of Cellular Metabolism and Metabolic Regulation, Department of Oncology, KU Leuven and Leuven Cancer Institute (LKI), Herestraat 49, 3000 Leuven, Belgium; <sup>6</sup>Department of Chemistry, KU Leuven, Celestijnenlaan 200G, 3001 Heverlee, Belgium; <sup>7</sup>Switch Laboratory, VIB Center for Brain and Disease Research, VIB-KU Leuven, Herestraat 49, 3000 Leuven, Belgium; <sup>8</sup>Switch Laboratory, Department of Cellular and Molecular Medicine, KU Leuven, Herestraat 49, 3000 Leuven, Belgium; <sup>9</sup>Department of Cardiovascular Sciences, University Hospitals Leuven, Herestraat 49, 3000 Leuven, Belgium; <sup>10</sup>Department of Hepatology, University Hospitals Leuven, Herestraat 49, 3000 Leuven, Belgium.

<sup>†</sup>Shared first authors

<sup>‡</sup>Shared last authors

**Running title:** Sertraline targets serine/glycine synthesis enzyme SHMT.

**Keywords:** Breast cancer, Cancer metabolism, Serine/glycine synthesis, Sertraline, SHMT

**Corresponding Authors:**

\* Kim De Keersmaecker, KU Leuven, Laboratory for Disease Mechanisms in Cancer, Department of Oncology, KU Leuven and Leuven Cancer Institute (LKI), Campus Gasthuisberg O&N1, box 603, Herestraat 49, 3000 Leuven. Phone number: +32 16 37 31 67.

E-mail: [kim.dekeersmaecker@kuleuven.be](mailto:kim.dekeersmaecker@kuleuven.be)

\* Karin Thevissen, KU Leuven, Centre of Microbial and Plant Genetics – Plant Fungi Interactions (CMPG-PFI), Kasteelpark Arenberg 20, box 2460, 3001 Heverlee. Phone number: +32 16 32 96 88 or +32 16 32 16 31.

E-mail: [karin.thevissen@kuleuven.be](mailto:karin.thevissen@kuleuven.be)

**Disclosure of Potential Conflicts of Interest:**

SMF has received funding from Bayer, Merck and Black Belt Therapeutics. All other authors declare no potential conflicts of interest.

**This file includes:**

- Supplementary Note
- Supplementary Materials and Methods
- Tables S1-S3
- Figures S1-S10
- SI References

## SUPPLEMENTARY NOTE

### **A serine/glycine synthesis dependent lower eukaryotic yeast model**

The yeast *Candida albicans*, the major fungal pathogen for humans, typically forms drug-tolerant biofilms on biotic surfaces such as the skin, the mouth, the human gastro-intestinal tract and genital area. To treat this type of mucosal fungal infection, azoles, such as miconazole, are currently used. In contrast to free-living *C. albicans* cells, the increasing tolerance of biofilm cells to azoles makes biofilm-associated infections hard to eradicate (1). Specifically, biofilm cells are up to thousand-fold more tolerant to miconazole than their planktonic counterparts (2).

Revisiting previously obtained transcriptome data of miconazole-induced tolerance pathways in *C. albicans* biofilm cells highlighted a biofilm-specific upregulation of genes involved in serine/glycine synthesis (*SHM2*) and one-carbon metabolism (*MET13*, *SAH1*, *GCV1*, *GCV2* and *MIS11*) (3). In support of these data, conditioned medium of *C. albicans* biofilms that were treated with a sublethal dose of miconazole contained an excess of serine and glycine as compared to conditioned medium of control cultures (Supplementary Fig. S1A). In this experimental set-up, there was no difference in reductive potential between miconazole-stressed *C. albicans* biofilm cells and control cells (Supplementary Fig. S1B). We therefore reasoned that miconazole-stressed *C. albicans* biofilm cells upregulate their serine/glycine synthesis as a tolerance mechanism against sublethal miconazole doses. Hence, miconazole-stressed *C. albicans* biofilms can serve as a valuable platform to screen for compounds targeting serine/glycine synthesis, which are expected to re-sensitize the biofilms to miconazole.

## SUPPLEMENTARY MATERIALS AND METHODS

***C. albicans* yeast strain and chemicals.** *C. albicans* strain SC5314 (4) was grown routinely on YPD (1% yeast extract, 2% peptone and 2% glucose) agar plates at 30°C. RPMI-1640 (pH 7.0) with L-glutamine and without sodium bicarbonate was buffered with MOPS. 1000x stock solutions of miconazole (Sigma-Aldrich #3512) and sertraline (Sigma-Aldrich #S6319) were prepared in DMSO and stored at -20°C.

***C. albicans* serine and glycine medium measurements.** A *C. albicans* SC5314 overnight culture, grown in YPD, was diluted to an optical density (OD) of 0.1 (approximately 10<sup>6</sup> cells/ml) in RPMI-1640 and 2 ml of this suspension was added to the wells of a 6-well plate. After 1 hour of adhesion at 37°C, the medium was aspirated and biofilms were washed with PBS to remove non-adherent cells, followed by addition of 2 ml fresh RPMI-1640. Subsequently, the biofilms were grown at 37°C for 24 hours. After washing the biofilms with PBS, miconazole (75 µM) was added in RPMI-1640, resulting in a DMSO background of 0.2%. Next, biofilms were incubated at 37°C for an additional 24 hours. Finally, 1 ml of conditioned medium was collected and serine and glycine were quantified by cation-exchange chromatography on a Biochrom 30 analyzer (Biochrom, Cambourne, UK).

***C. albicans* metabolic activity assay.** Biofilms were grown in 6-well plates and treated in RPMI-1640 as described above. After washing with PBS, 2 ml Cell-Titer Blue (CTB; Promega #G8080) (5), diluted 1:100 in PBS, was added to each well. After 1 hour of incubation in the dark at 37°C, fluorescence was measured with a fluorescence spectrometer (Synergy Mx Multimode Microplate Reader; BioTek) at  $\lambda_{\text{ex}}$  of 535 nm and  $\lambda_{\text{em}}$  of 590 nm. Finally, the percentage of metabolically active biofilm cells was calculated as described before (6).

***C. albicans* nuclear membrane permeability assay.** Biofilms were grown in 96-well plates and treated with miconazole (75 µM) and/or sertraline (75 µM) in RPMI-1640. After washing with PBS, propidium iodide staining (Sigma-Aldrich) was performed as previously described (7).

**Generation of Ba/F3 CRISPR-Cas9 RPL10 R98S mutant cells.** Ba/F3 cells were electroporated (6 square wave pulses, 0.1ms interval, 175V) with a pX458 vector (a gift from Feng Zhang; Addgene plasmid #48138, RRID:Addgene\_48138) containing an Rpl10-targeting sgRNA (5'-TGATACGGATGACATGGAAA-3') and a 117-nt donor oligo containing the R98S allele as well as 3 silent mutations to avoid re-recognition and cutting by the sgRNA-Cas9 complex (5'-CCAACAAATACATGGTAAAGAGTTGTGGCAAGGATGGCTTTCATATCCGAGTGAGGCTCCATCCTTTTCATGTAATCAGTATCAACAAGATGTTGTCCTGTGCTGGGGCTGACAGGT-3'; Integrated DNA Technologies). Following electroporation, cells were incubated for 24 hours in the presence of 10 µM SCR7 (Sigma-Aldrich #SML1546), followed by single cell sorting (BD FACS

Aria III) into ClonaCell™-TCS Medium (STEMCELL Technologies #03814). Outgrowing clones were expanded and screened for the desired modification using Sanger sequencing to confirm the Rpl10 status and to check for modification of relevant predicted off-target effects (Rpl10-ps3 and Rpl10l).

**Gas chromatography–mass spectrometry (GC-MS).** Polar metabolites were derivatized and measured as described before (8,9). In brief, polar metabolites were derivatized with 20 mg/ml methoxyamine in pyridine at 37°C for 90 minutes and subsequently with N-(tert-butyltrimethylsilyl)-N-methyl-trifluoroacetamide, with 1% tert-butyltrimethylchlorosilane at 60°C for 60 minutes. Metabolites were measured with a 7890A GC system (Agilent Technologies) combined with a 5975C Inert MS system (Agilent Technologies). One microliter of samples was injected in split mode (ratio 1 to 3) with an inlet temperature of 270°C onto a DB35MS column. The carrier gas was helium with a flow rate of 1 ml/min. For the measurement of polar metabolites from the deuterated serine labeling experiment, the GC oven was set at 100°C for 1 minute and then increased to 105°C at 2.5°C/min and with a gradient of 2.5°C/min finally to 320°C at 22°C/min. The measurement of metabolites has been performed under electron impact ionization at 70 eV using a selected-ion monitoring (SIM) mode. For the measurement of polar metabolites from the <sup>13</sup>C<sub>6</sub>-glucose labeling experiment, the GC oven was held at 100°C for 3 minutes and then ramped to 300°C with a gradient of 2.5°C/min. The mass spectrometer system was operated under electron impact ionization at 70 eV and a mass range of 100–650 a.m.u. was scanned. Mass distribution vectors were extracted from the raw ion chromatograms using a custom Matlab M-file (MATLAB, RRID:SCR\_001622), which applies consistent integration bounds and baseline correction to each ion (10). Moreover, data were corrected for naturally occurring isotopes (11). For metabolite levels, arbitrary units of the metabolites of interest were normalized to glutaric acid, an internal standard, and protein content.

**Liquid chromatography–mass spectrometry (LC-MS).** A liquid chromatography, Dionex UltiMate 3000 LC System (Thermo Scientific), coupled to mass spectrometry (MS), a Q Exactive Orbitrap (Thermo Scientific), was used for the separation of polar metabolites. A volume of 15 µl of sample was injected and metabolites were separated on a C18 column (Acquity UPLC HSS T3 1.8 µm 2.1x100 mm) at a flow rate of 0.25 ml/min, at 40°C. A gradient was applied for 40 minutes (solvent A: 0 H<sub>2</sub>O, 10 mM Tributyl-Amine, 15 mM acetic acid – solvent B: Methanol) to separate the targeted metabolites (0 min: 0% B, 2 min: 0% B, 7 min: 37% B, 14 min: 41% B, 26 min: 100% B, 30 min: 100% B, 31 min: 0% B; 40 min: 0% B). The MS operated in full scan in negative mode (m/z range: 70-1050 and 300-800 from 8 to 25 min) using a spray voltage of 4.9 kV, capillary temperature of 320°C, sheath gas at 50.0, auxiliary gas at 10.0. Data was collected using the

Xcalibur software (Thermo Xcalibur, RRID:SCR\_014593) and analyzed with Matlab (MATLAB, RRID:SCR\_001622) using the same procedure as described above for the analysis of GC-MS data.

## SUPPLEMENTARY TABLES

**Table S1. List of yeast re-sensitizing agents.**

| Re-sensitizing capacity                 | Compound                               | Clinical use                             |                                       |
|-----------------------------------------|----------------------------------------|------------------------------------------|---------------------------------------|
| <b>HIGH (&gt;90%)</b>                   | Clioquinol                             | Antifungal, antiprotozoal                |                                       |
|                                         | Benzalkonium chloride                  | Disinfectant, antimicrobial, antifungal  |                                       |
|                                         | Dequalinium chloride                   | Antiseptic, disinfectant, bacteriostatic |                                       |
|                                         | Methylbenzethonium chloride            | Antiseptic, disinfectant, antimicrobial  |                                       |
|                                         | Pyrvinium pamoate                      | Anthelmintic                             |                                       |
|                                         | Hexachlorophene                        | Disinfectant, antibacterial, antifungal  |                                       |
|                                         | Dichlorophene                          | Antifungal, antimicrobial, anticestodal  |                                       |
|                                         | Bithionate sodium                      | Anthelmintic                             |                                       |
|                                         | Alexidine hydrochloride                | Antimicrobial                            |                                       |
|                                         | Gentian/Crystal violet                 | Antibacterial, antifungal, anthelmintic  |                                       |
| <b>INTERMEDIATE (50-90%)</b>            | <b>Thimerosal (sulfur groups)</b>      | Antiseptic, antifungal                   |                                       |
|                                         | Phenylmercuric acetate                 | Preservative, disinfectant               |                                       |
|                                         | Nitroxoline                            | Antibacterial                            |                                       |
|                                         | Chloroxine                             | Antibacterial                            |                                       |
|                                         | Piroctone olamine                      | Antifungal, anti-dandruff shampoo        |                                       |
|                                         | Ciclopirox olamine                     | Antifungal                               |                                       |
|                                         | <b>Pyrithione zinc (sulfur groups)</b> | Fungistatic, bacteriostatic              |                                       |
|                                         | Broxyquinoline                         | Antiprotozoal                            |                                       |
|                                         | Iodoquinol                             | Treatment of amoebiasis                  |                                       |
|                                         | Evans blue                             | Viability assay dye                      |                                       |
|                                         | Artemisinin                            | Antimalarial                             |                                       |
|                                         | Artemimol                              | Antimalarial                             |                                       |
|                                         | Abamectin                              | Insecticide, anthelmintic                |                                       |
|                                         | <b>LOW (&lt;50%)</b>                   | <b>Suloctidil (sulfur groups)</b>        | Vasodilator                           |
|                                         |                                        | Isosorbide mononitrate                   | Treatment of heart related chest pain |
| Sodium nitroprusside                    |                                        | Antihypertensive                         |                                       |
| Temozolomide                            |                                        | Oral chemotherapy drug                   |                                       |
| Folic acid                              |                                        | Vitamin B <sub>9</sub>                   |                                       |
| Bupropion                               |                                        | Antidepressant                           |                                       |
| Sulfamethoxypyridazine                  |                                        | Antibacterial                            |                                       |
| Oxantel pamoate                         |                                        | Anthelmintic                             |                                       |
| <b>Tioconazole (sulfur groups)</b>      |                                        | Antifungal                               |                                       |
| <b>Butoconazole (sulfur groups)</b>     |                                        | Antifungal                               |                                       |
| Flucytosine                             |                                        | Antifungal                               |                                       |
| Diacetamate                             |                                        | Analgesic, anti-inflammatory drug        |                                       |
| Artemether                              |                                        | Antimalarial                             |                                       |
| Artesunate                              |                                        | Antimalarial                             |                                       |
| Orbifloxacin                            |                                        | Antibacterial                            |                                       |
| Salinomycin                             |                                        | Antibacterial                            |                                       |
| Methenamine                             |                                        | Hardening component, binder              |                                       |
| Candicidin                              |                                        | Antifungal                               |                                       |
| Warfarin                                |                                        | Anticoagulant, blood thinner             |                                       |
| Carvedilol phosphate                    |                                        | Antihypertensive                         |                                       |
| Acipimox                                |                                        | Lipid-lowering agent                     |                                       |
| Merbromin                               |                                        | Antiseptic                               |                                       |
| Phentermine                             |                                        | Treatment of obesity                     |                                       |
| <b>Malathion (sulfur groups)</b>        |                                        | Insecticide                              |                                       |
| <b>Methylene blue (sulfur groups)</b>   |                                        | Treatment of methemoglobinemia, dye      |                                       |
| <b>Sulfanilate zinc (sulfur groups)</b> | Antibacterial                          |                                          |                                       |

**Table S2. Computational docking and ligand efficiency scores of sertraline to SHMT1.** A list of 6392 FDA approved molecules was docked into the active pocket of SHMT1 to compare with sertraline's docking and ligand efficiency score. The antifolate drugs pemetrexed and lometrexol, that are part of the list of FDA approved drugs, are used as a reference for SHMT inhibition.

| <b>Compound</b>         | <b>Docking score</b> | <b>Ligand Efficiency</b> |
|-------------------------|----------------------|--------------------------|
| Sertraline              | 61.49                | 3.07                     |
| Pemetrexed <sup>a</sup> | 79.29                | 2.55                     |
| Lometrexol <sup>a</sup> | 81.86                | 2.55                     |

<sup>a</sup> *Confirmed antifolate drugs with SHMT inhibitory activity.*

**Table S3. Computational docking and ligand efficiency score of sertraline to SHMT2.** A list of 6392 FDA approved molecules was docked into the active pocket of SHMT2 to compare with sertraline's docking and ligand efficiency score. The antifolate drugs pemetrexed and lometrexol, that are part of the list of FDA approved drugs, are used as a reference for SHMT inhibition.

| <b>Compound</b>         | <b>Docking score</b> | <b>Ligand Efficiency</b> |
|-------------------------|----------------------|--------------------------|
| Sertraline              | 51.34                | 2.56                     |
| Pemetrexed <sup>a</sup> | 68.48                | 2.20                     |
| Lometrexol <sup>a</sup> | 72.25                | 2.25                     |

<sup>a</sup> *Confirmed antifolate drugs with SHMT inhibitory activity.*



## SUPPLEMENTARY FIGURES

**Figure S1**

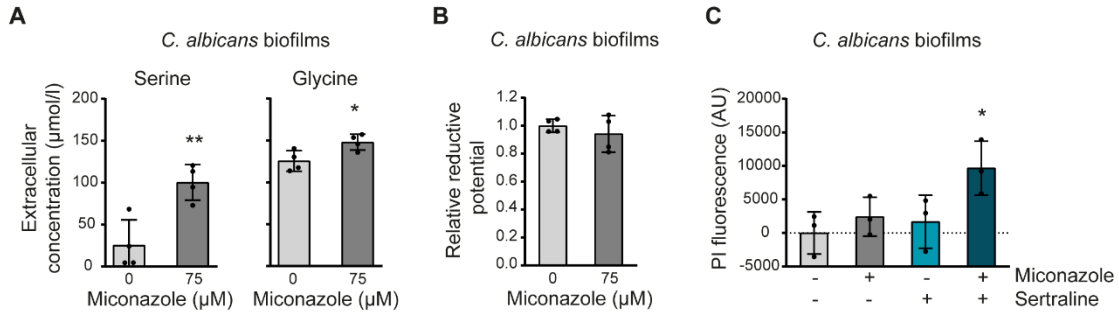

**Figure S1. Sertraline re-sensitizes *Candida albicans* biofilms that upregulate their serine/glycine synthesis as a tolerance mechanism against sublethal antifungal stress. (A)** Serine (left) and glycine (right) extracellular concentrations ( $\mu\text{mol/l}$ ) of *C. albicans* biofilms treated with control (DMSO) or miconazole (75  $\mu\text{M}$ ) for 24 hours ( $n = 4$ , Student's t-test). **(B)** Reductive potential, measured with Cell-Titer Blue, of miconazole-stressed (75  $\mu\text{M}$ ) *C. albicans* biofilm cells and control cells (DMSO) ( $n = 4$ , Student's t-test). **(C)** Cell death, measured using propidium iodide (PI), of *C. albicans* biofilms treated with control (DMSO), miconazole (75  $\mu\text{M}$ ), sertraline (75  $\mu\text{M}$ ) or a combination of both ( $n = 3$ , Two-way ANOVA, Dunnett's multiple comparisons test). While 75  $\mu\text{M}$  of miconazole or sertraline monotherapy was not significantly affecting cell death, sertraline was able to re-sensitize biofilm cells to miconazole's activity, resulting in approximately 4-fold increased cell death as compared to single drug treatment. In **(A-C)** data are presented as mean  $\pm$  SD. \* $p < 0.05$ , \*\* $p < 0.01$ .

**Figure S2**

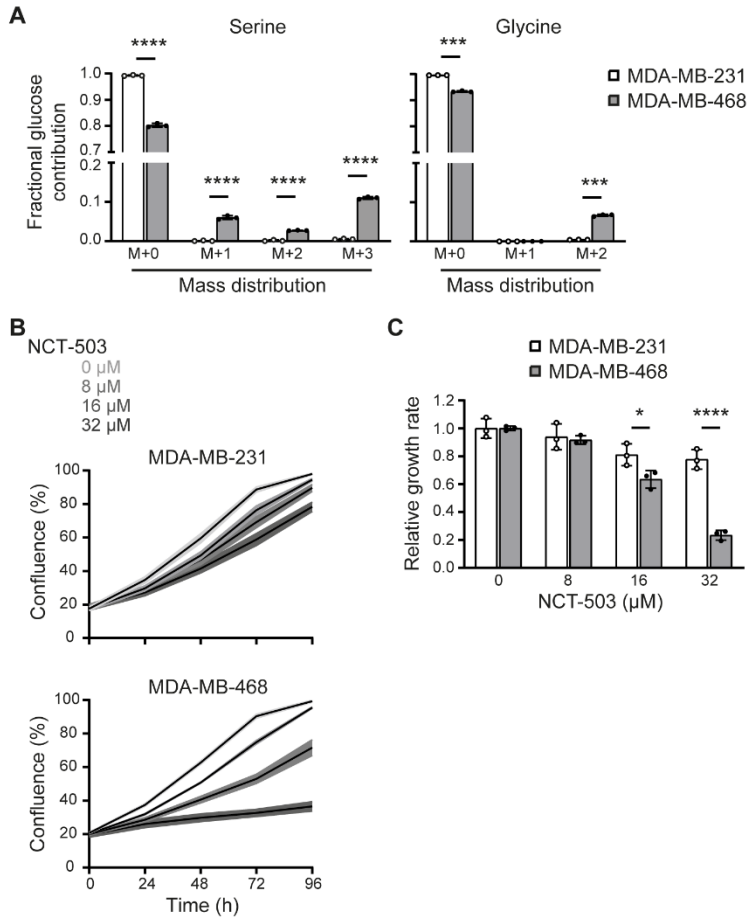

**Figure S2. MDA-MB-231 and MDA-MB-468 distinguish in being serine/glycine uptake versus serine/glycine synthesis addicted, respectively. (A)** Carbon incorporation from  $^{13}\text{C}_6$ -glucose into serine and glycine in MDA-MB-231, a serine/glycine uptake dependent BRCA cell line, and MDA-MB-468, a serine/glycine synthesis addicted BRCA cell line ( $n = 3$ , Multiple t-test). **(B)** Proliferation during 96 hours, as determined by real-time monitoring of cell confluence (%), of MDA-MB-231 (upper) and MDA-MB-468 (lower) cells upon treatment with indicated concentrations of NCT-503. One representative result of three biological replicates, containing each at least three technical replicates, is shown. **(C)** Quantification of (B). Data are presented as growth rate relative to the control treatment ( $n = 3$ , Two-way ANOVA, Sidak's multiple comparisons test). In **(A-C)** data are presented as mean  $\pm$  SD. \* $p < 0.05$ , \*\*\* $p < 0.001$ , \*\*\*\* $p < 0.0001$ .

**Figure S3**

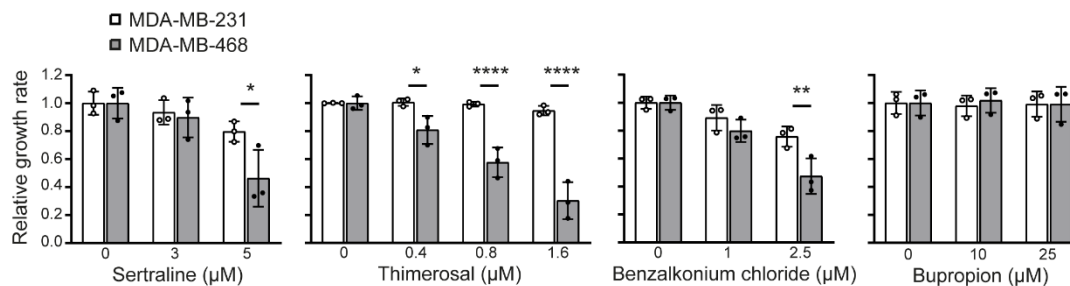

**Figure S3. Sertraline, thimerosal and benzalkonium chloride selectively decrease MDA-MB-468 cell proliferation.** Quantification of proliferation during 96 hours, as determined by real-time monitoring of cell confluence (%), of MDA-MB-231 (white) and MDA-MB-468 (grey) cells upon treatment with indicated concentrations of sertraline, thimerosal, benzalkonium chloride and bupropion (left to right). Data are presented as growth rate relative to the control treatment (mean  $\pm$  SD). \* $p < 0.05$ , \*\* $p < 0.01$ , \*\*\*\* $p < 0.0001$ , Two-way ANOVA, Sidak's multiple comparisons test.

**Figure S4**

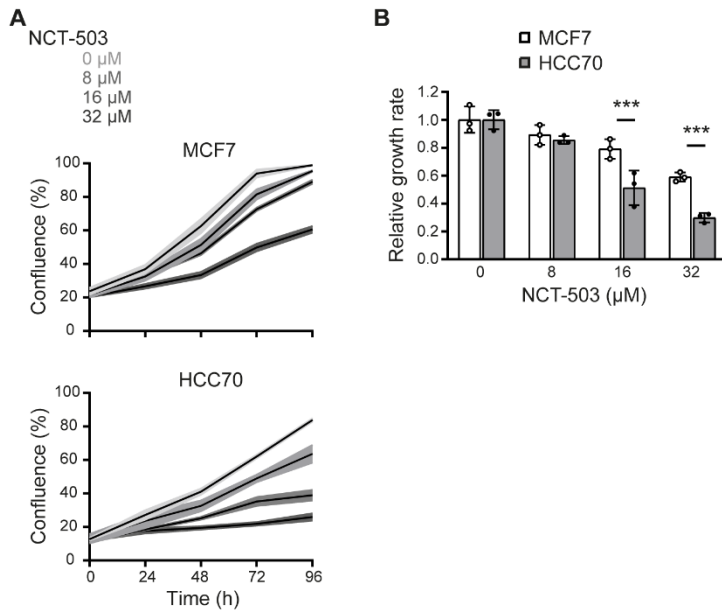

**Figure S4. NCT-503 inhibits proliferation of HCC70 more than of MCF7. (A)** Proliferation during 96 hours, as determined by real-time monitoring of cell confluence (%), of MCF7 (upper), a serine/glycine uptake dependent BRCA cell line, and HCC70 (lower), a serine/glycine synthesis addicted BRCA cell line, cells upon treatment with indicated concentrations of NCT-503. One representative result of three biological replicates, containing each at least three technical replicates, is shown. **(B)** Quantification of (A). Data are presented as growth rate relative to the control treatment (n = 3, Two-way ANOVA, Sidak's multiple comparisons test). In **(A-B)** data are presented as mean  $\pm$  SD. \*\*\*p < 0.001.

**Figure S5**

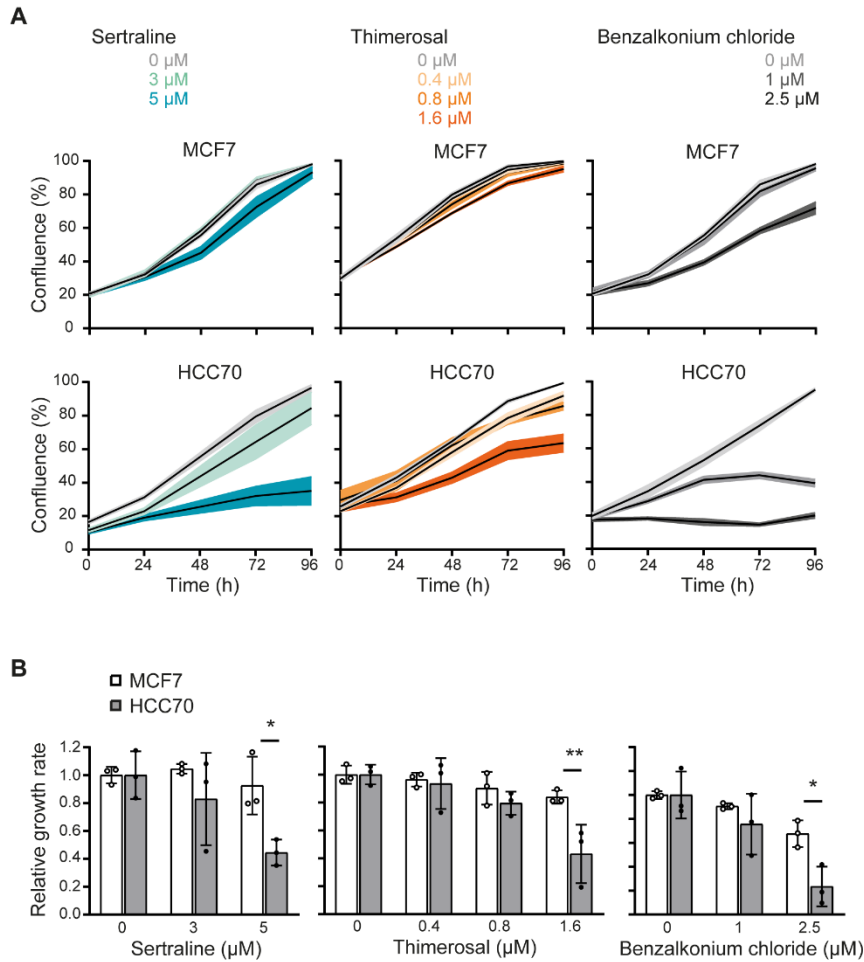

**Figure S5. Sertraline, thimerosal and benzalkonium chloride selectively impair HCC70 cell proliferation. (A)** Proliferation during 96 hours, as determined by real-time monitoring of cell confluence (%), of MCF7 (upper) and HCC70 (lower) cells upon treatment with indicated concentrations of sertraline, thimerosal, benzalkonium chloride (left to right). **(B)** Quantification of (A). Data are presented as growth rate relative to the control treatment ( $n = 3$ , Two-way ANOVA, Sidak's multiple comparisons test). In **(A-B)** data are presented as mean  $\pm$  SD. \* $p < 0.05$ , \*\* $p < 0.01$ .

**Figure S6**

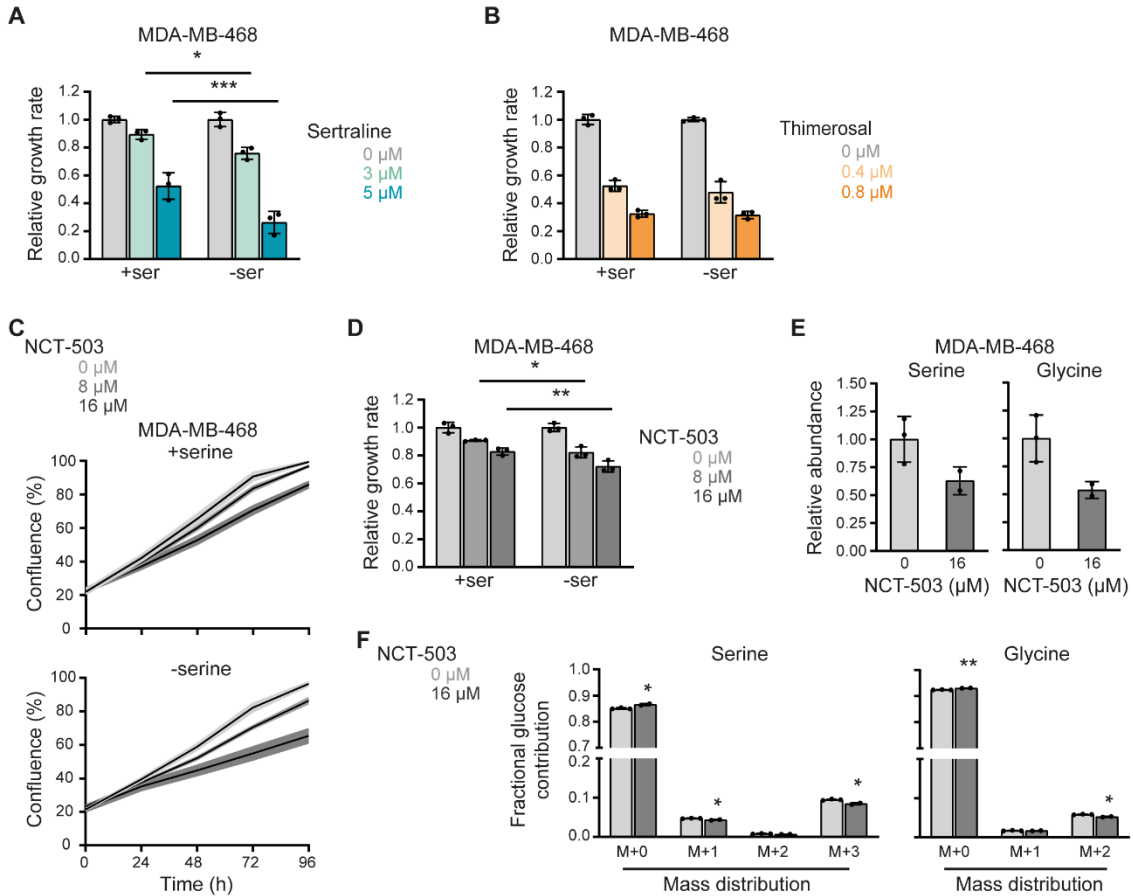

**Figure S6. Sertraline and thimerosal act as NCT-503. (A-B)** Quantification of proliferation during 96 hours, as determined by real-time monitoring of cell confluence (%), of MDA-MB-468 cells cultured in DMEM with or without serine (400  $\mu\text{M}$ ) and treated with indicated concentrations of sertraline (A) or thimerosal (B). Data are presented as growth rate relative to the control treatment ( $n = 3$ , Two-way ANOVA, Sidak's multiple comparisons test). **(C)** Proliferation during 96 hours, as determined by real-time monitoring of cell confluence (%), of MDA-MB-468 cells cultured in DMEM with or without serine (400  $\mu\text{M}$ ) and treated with indicated concentrations of NCT-503. One representative result of three biological replicates, containing each at least three technical replicates, is shown. **(D)** Quantification of (C). Data are presented as growth rate relative to the control treatment ( $n = 3$ , Two-way ANOVA, Sidak's multiple comparisons test). **(E)** Relative abundance of intracellular serine and glycine in MDA-MB-468 cells treated with control (DMSO) or NCT-503 (16  $\mu\text{M}$ ) for 24 hours ( $n = 2-3$ , Student's t-test). **(F)** Serine and glycine mass distribution showing the fractional glucose contribution of each mass upon treatment of MDA-MB-468 cells with

control (DMSO) or NCT-503 (16  $\mu$ M) (n = 2-3, Multiple t-test). In (A-F) data are presented as mean  $\pm$  SD. \*p < 0.05, \*\*p < 0.01, \*\*\*p < 0.001.

Figure S7

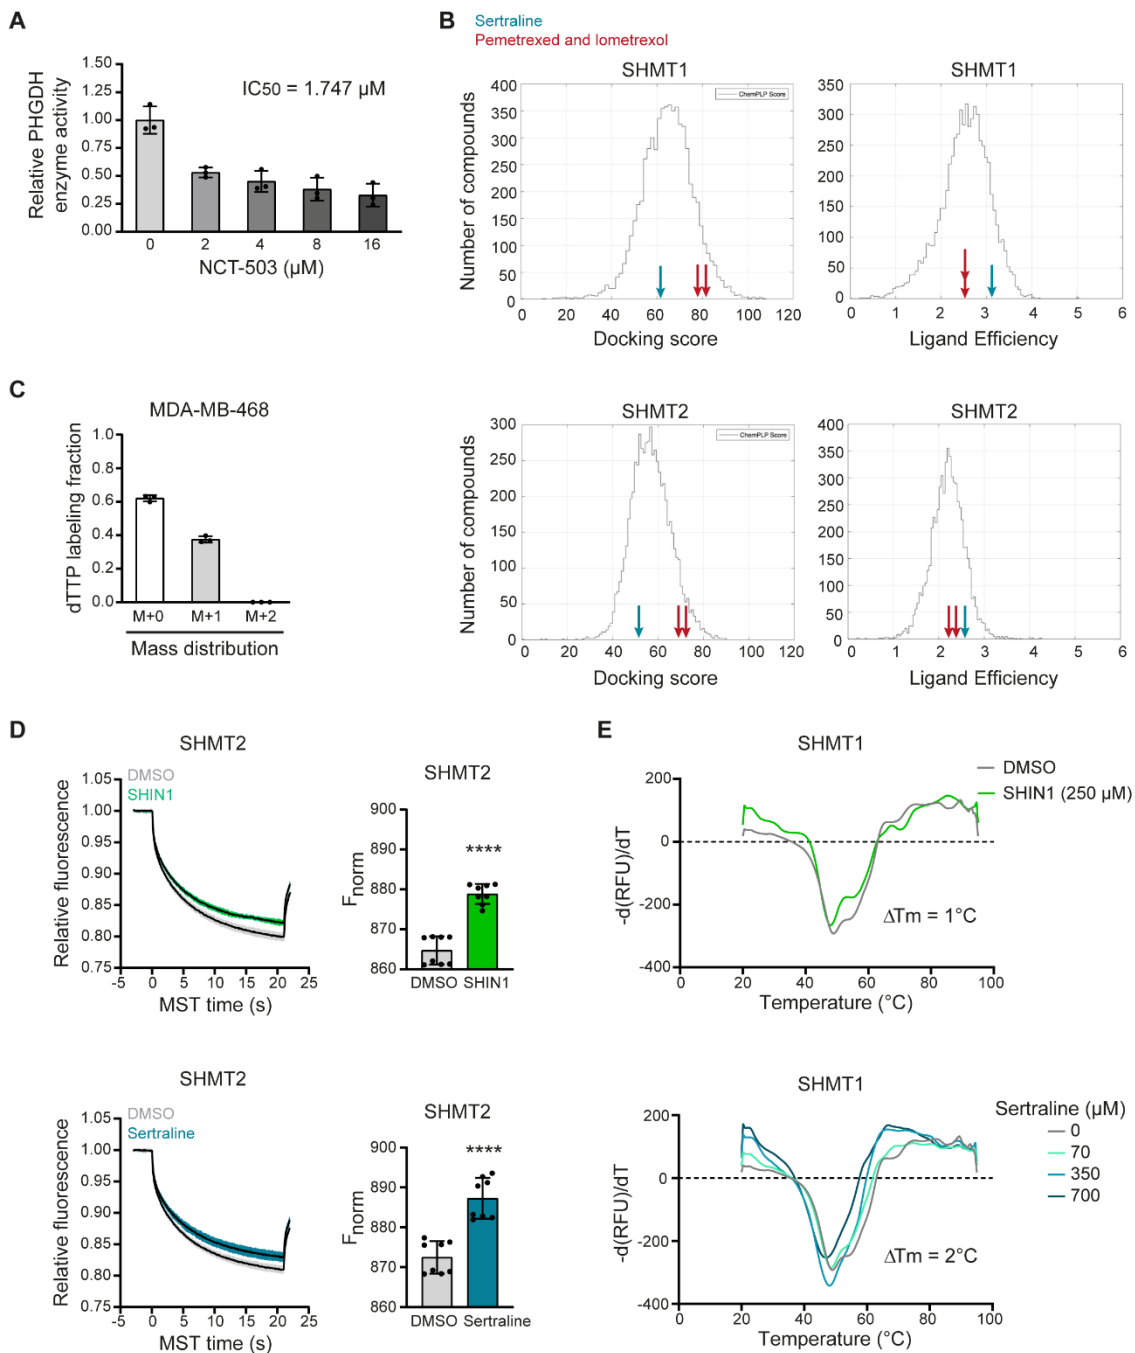

**Figure S7. Sertraline is a dual SHMT1/2 inhibitor. (A)** PHGDH *in vitro* enzymatic assay, measuring PHGDH activity upon addition of indicated concentrations of NCT-503. Values are presented relative to the control (n = 3). **(B)** Histograms showing the docking scores (left) and ligand efficiencies (right) of 6392 FDA approved molecules docked into the active pocket of SHMT1



(upper) and SHMT2 (lower). The SHMT inhibiting antifolates, pemetrexed and lometrexol, are indicated with red arrows to compare with sertraline (blue arrow). **(C)** Deuterium label ( $^2\text{H}$ ) incorporation into thymidine (dTTP) in MDA-MB-468 cells incubated with [2,3,3- $^2\text{H}$ ]-serine (deuterium labeled serine) for 48 hours. Only M+1 dTTP (SHMT2), and no M+2 dTTP (SHMT1), was detected ( $n = 3$ ). **(D)** MST curves (left) and normalized fluorescence data at 5 seconds ( $F_{\text{norm}}$ ) for SHMT2 bound by 500  $\mu\text{M}$  SHIN1 (upper) or 730  $\mu\text{M}$  sertraline (lower). Error bars represent the standard deviation of the measurements of two independent repeats ( $n = 2$ ), containing each at least four technical replicates. **(E)** Melting temperature ( $T_m$ ) curves demonstrating destabilization of SHMT1 upon binding of SHIN1 (upper) and sertraline (lower). One representative result of two biological replicates is shown. In **(A, C and D)** data are presented as mean  $\pm$  SD. \*\*\*\* $p < 0.0001$ .

**Figure S8**

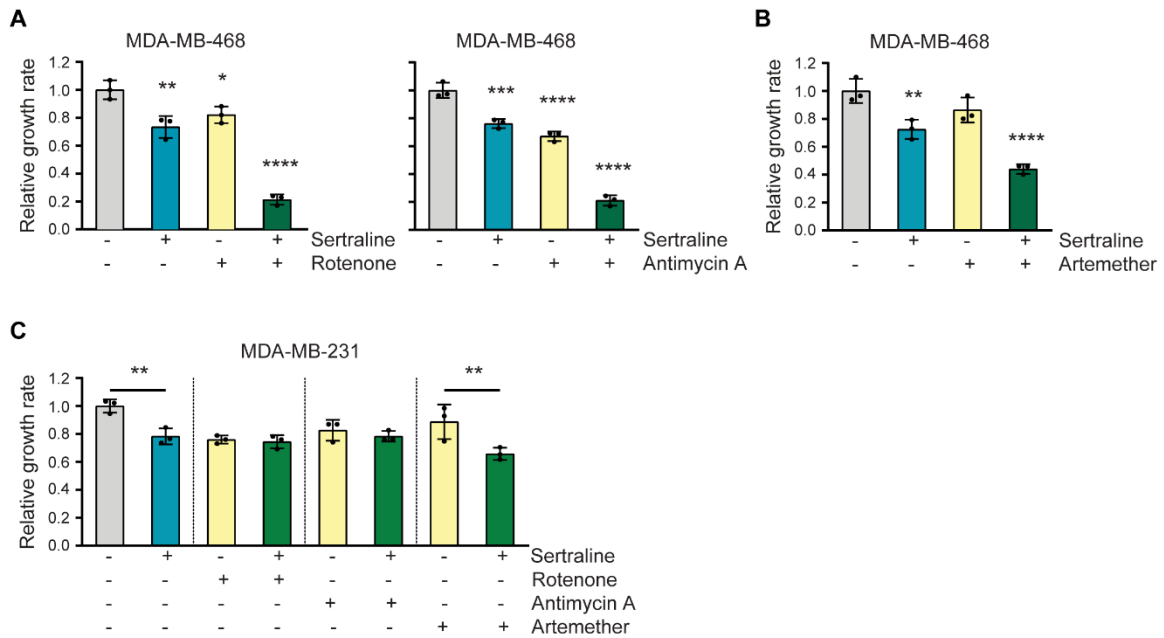

**Figure S8. Combining sertraline with drugs causing general mitochondrial dysfunction further decreases proliferation of MDA-MB-468 cells. (A-B)** Quantification of proliferation during 96 hours, as determined by real-time monitoring of cell confluence (%), of MDA-MB-468 cells upon treatment with sertraline (5  $\mu$ M) (blue) and/or (green/yellow) rotenone (50 nM) (A), antimycin A (50 nM) (A) or artemether (80  $\mu$ M) (B) (n = 3, Two-way ANOVA, Dunnet's multiple comparisons test). **(C)** Quantification of proliferation during 96 hours, as determined by real-time monitoring of cell confluence (%), of MDA-MB-231 cells upon treatment with sertraline (5  $\mu$ M) (blue) and/or (green/yellow) rotenone (50 nM), antimycin A (50 nM) or artemether (80  $\mu$ M) (n = 3, One-way ANOVA, Sidak's multiple comparisons test). In **(A-C)** data are presented as growth rate relative to the control treatment (mean  $\pm$  SD). \*p < 0.05, \*\*p < 0.01, \*\*\*p < 0.001, \*\*\*\*p < 0.0001.

Figure S9

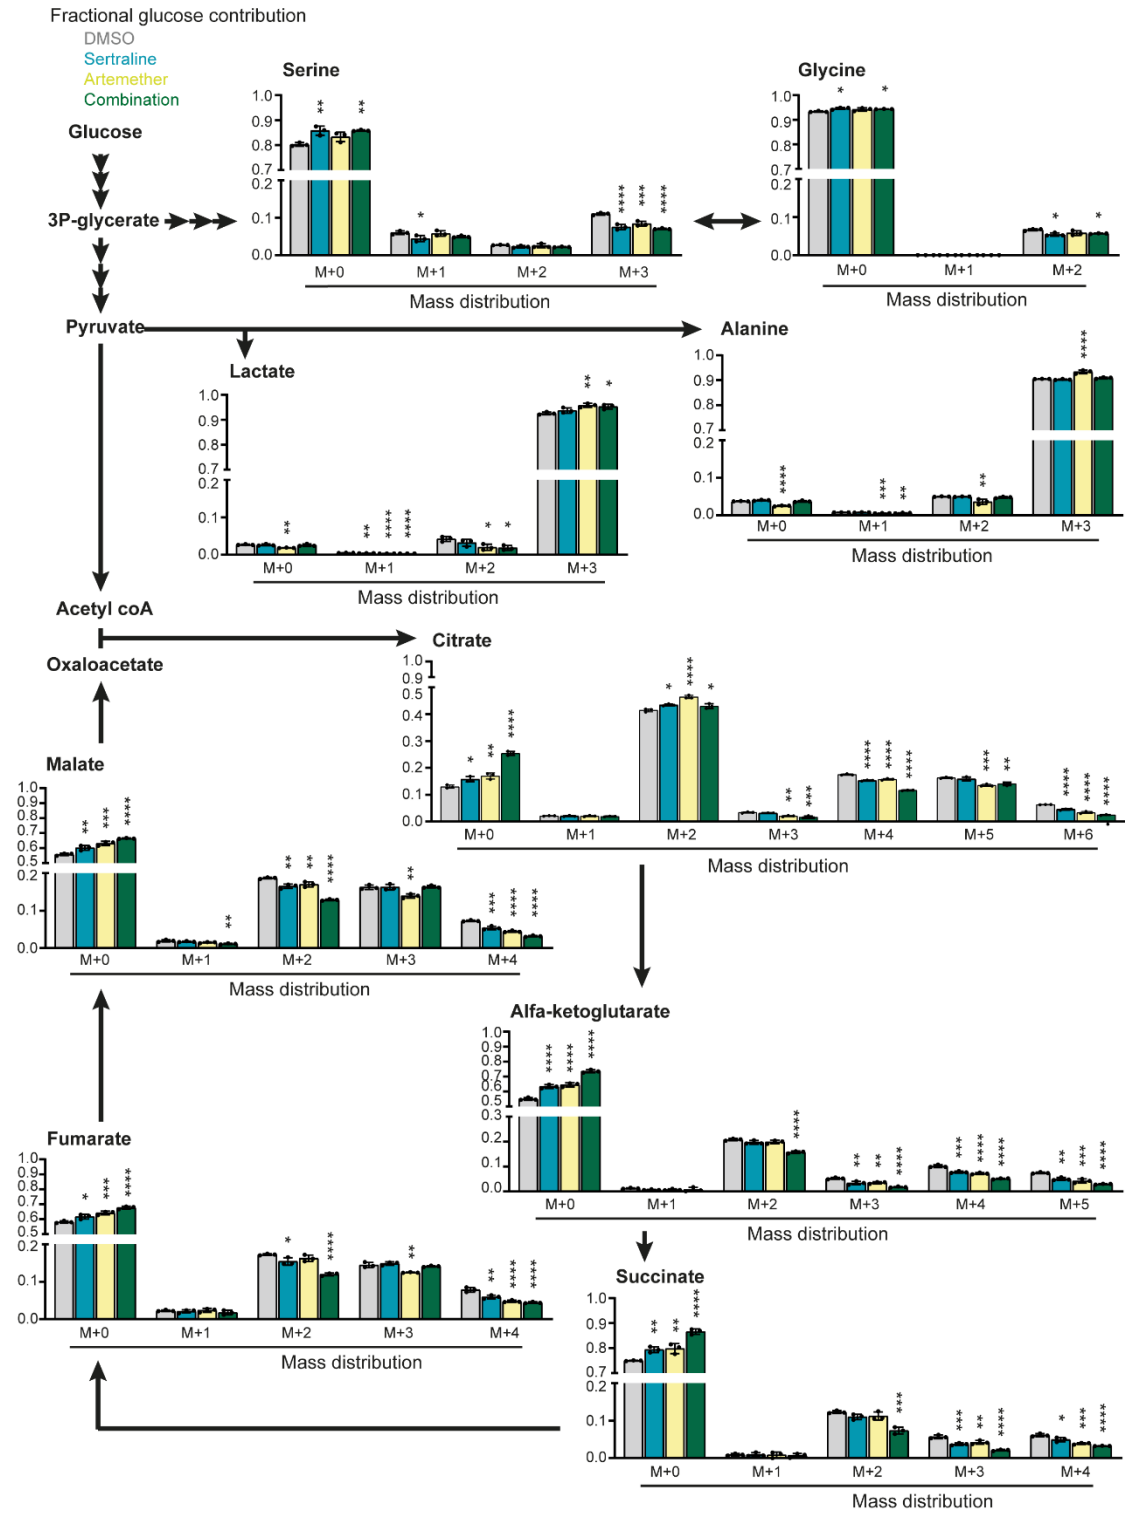

Figure S9. The artemether-sertraline combination further metabolically disrupts cancer cells. Carbon incorporation from  $^{13}\text{C}_6$ -glucose into downstream metabolites showing that both

compounds work together in reducing the proliferation of MDA-MB-468 by decreasing both the amount of labeled TCA cycle metabolites and the flux through serine/glycine synthesis. The effect on serine/glycine synthesis is due to sertraline rather than artemether (blue = sertraline, yellow = artemether, green = combination) (n = 3, Two-way ANOVA, Dunnett's multiple comparisons test). Data are presented as mean  $\pm$  SD. \*p<0.05, \*\*p<0.01, \*\*\*p<0.001, \*\*\*\*p<0.0001.

**Figure S10**

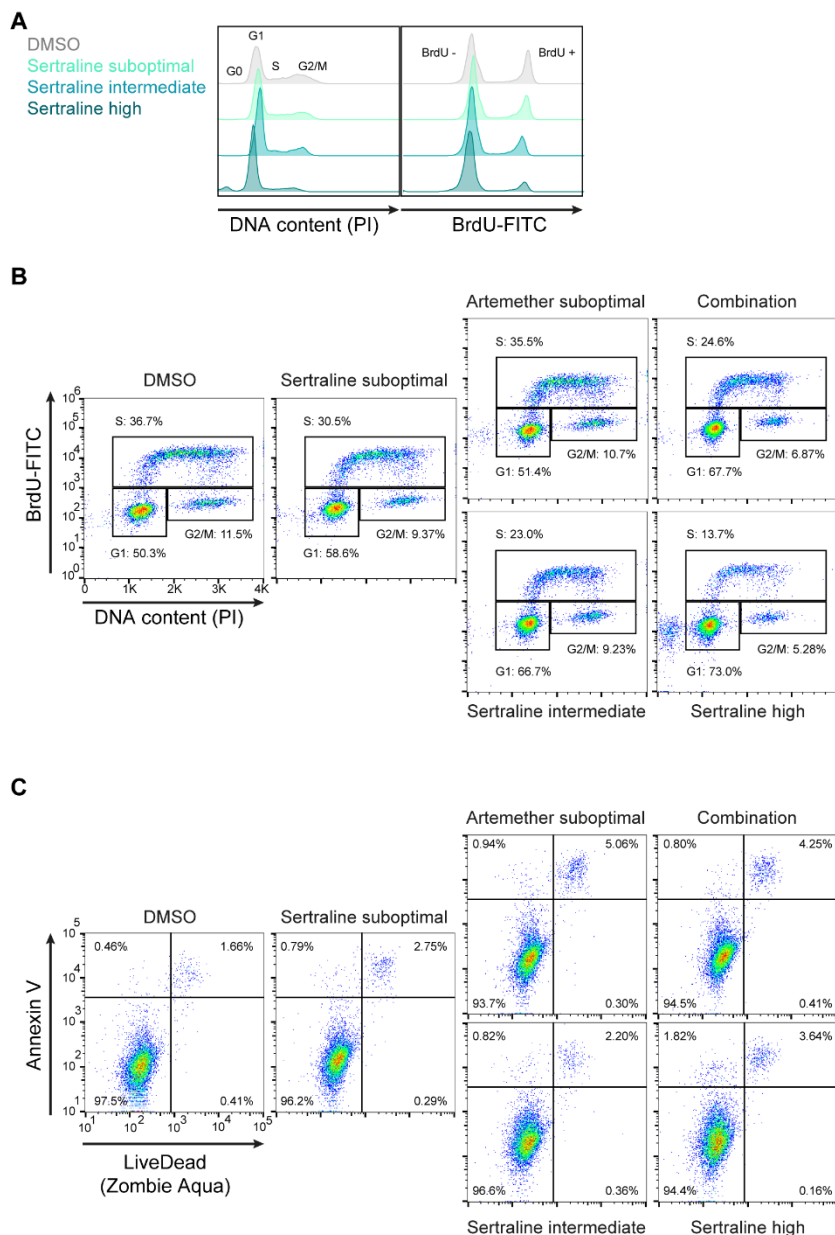

**Figure S10. The sertraline-artemether combination causes G1-S cell cycle arrest. (A)** Histograms showing PI cell cycle analysis (left) and BrdU incorporation (right) of MDA-MB-468 cells treated with DMSO or sertraline (sub-optimal = 5  $\mu$ M; intermediate = 7.5  $\mu$ M; high = 10  $\mu$ M) for 24 hours. One representative result of three biological replicates is shown. **(B)** Representative FACS dot-plot for BRDU-PI cell cycle analysis of MDA-MB-468 cells treated with DMSO, sertraline (sub-optimal = 5  $\mu$ M; intermediate = 7.5  $\mu$ M; high = 10  $\mu$ M) and/or artemether (80  $\mu$ M) for 24 hours and incubated with BrdU for 1 hour. Cells were gated on viable cells, including the single cells. **(C)**

Representative FACS dot-plot for Annexin V (PE) – Zombie Aqua (eFluor506) cell viability staining of MDA-MB-468 cells treated with DMSO, sertraline (sub-optimal = 5  $\mu$ M; intermediate = 7.5  $\mu$ M; high = 10  $\mu$ M) and/or artemether (80  $\mu$ M) for 24 hours. Cells were gated on viable cells, including the single cells.

## SI REFERENCES

1. Ramage G, Rajendran R, Sherry L, Williams C. Fungal biofilm resistance. *Int J Microbiol* 2012;**2012**:528521.
2. Delattin N, Cammue BPA, Thevissen K. Reactive oxygen species-inducing antifungal agents and their activity against fungal biofilms. *Future Med Chem* 2014;**6**:77–90.
3. De Cremer K, De Brucker K, Staes I, Peeters A, Van Den Driessche F, Coenye T, et al. Stimulation of superoxide production increases fungicidal action of miconazole against *Candida albicans* biofilms. *Sci Rep* 2016;**6**:27463.
4. Fonzi WA, Irwin MY. Isogenic strain construction and gene mapping in *Candida albicans*. *Genetics* 1993;**134**:717–28.
5. O'Brien J, Wilson I, Orton T, Pognan F. Investigation of the Alamar Blue (resazurin) fluorescent dye for the assessment of mammalian cell cytotoxicity. *Eur J Biochem* 2000;**267**:5421–6.
6. Spincemaille P, Chandhok G, Newcomb B, Verbeek J, Vriens K, Zibert A, et al. The plant decapeptide OSIP108 prevents copper-induced apoptosis in yeast and human cells. *Biochim Biophys Acta - Mol Cell Res* 2014;**1843**:1207–15.
7. Bink A, Kucharíková S, Neirinck B, Vleugels J, Van Dijck P, Cammue BPA, et al. The nonsteroidal antiinflammatory drug diclofenac potentiates the in vivo activity of caspofungin against *Candida albicans* biofilms. *J Infect Dis* 2012;**206**:1790–7.
8. Christen S, Lorendeau D, Schmieder R, Broekaert D, Metzger K, Veys K, et al. Breast Cancer-Derived Lung Metastases Show Increased Pyruvate Carboxylase-Dependent Anaplerosis. *Cell Rep* 2016;**17**:837–48.
9. Lorendeau D, Rinaldi G, Boon R, Spincemaille P, Metzger K, Jäger C, et al. Dual loss of succinate dehydrogenase (SDH) and complex I activity is necessary to recapitulate the metabolic phenotype of SDH mutant tumors. *Metab Eng* 2017;**43**:187–97.
10. Young JD, Walther JL, Antoniewicz MR, Yoo H, Stephanopoulos G. An elementary metabolite unit (EMU) based method of isotopically nonstationary flux analysis. *Biotechnol Bioeng* 2008;**99**:686–99.
11. Fernandez CA, Des Rosiers C, Previs SF, David F, Brunengraber H. Correction of <sup>13</sup>C mass isotopomer distributions for natural stable isotope abundance. *J Mass Spectrom* 1996;**31**:255–62.
